# Supplementary material for: A theoretical insight on the rigid hydrogen-bonded network in the solid state structure of two zinc(ii) complexes and their strong fluorescence behaviors
Source: Royal Society of Chemistry journal article supplement (doi:10.1039/d0ce00125b), 2020-01-01
Supplement: d0ce00125b1.pdf [file d0ce00125b1.pdf]

## Supplementary information

# A theoretical insight on the rigid hydrogen-bonded network in the solid state structure of two zinc(II) complexes and their strong fluorescence behaviors

Ipsita Mondal, Tanmoy Basak, Snehasis Banerjee and Shouvik Chattopadhyay

**Table S1. Selected Frontier molecular orbital energies (eV) and compositions (%) in the ground state for complex 1.**

| MO   | energy | contribution         |                |    |    | assignment (major)            |
|------|--------|----------------------|----------------|----|----|-------------------------------|
|      |        | SB                   | N <sub>3</sub> | Ac | Zn |                               |
| L+13 | 2.41   | 94                   | 1              | 1  | 4  | $\pi^*(SB)$                   |
| L+12 | 2.29   | 83                   | 7              | 2  | 8  | $\pi^*(SB)$                   |
|      |        |                      |                |    |    | $\pi^*(SB)+$                  |
| L+9  | 1.71   | 23                   | 20             | 3  | 54 | $\pi^*(N_3)+d^*(Zn)$          |
| L+5  | 1.03   | 33                   | 6              | 8  | 53 | $\pi^*(SB)+d^*(Zn)$           |
| L+4  | 0.81   | 11                   | 1              | 77 | 11 | $\pi^*(SB)+\pi^*(Ac)+d^*(Zn)$ |
| L+3  | 0.07   | 100                  | 0              | 0  | 0  | $\pi^*(SB)$                   |
| L+2  | -0.09  | 99                   | 0              | 0  | 1  | $\pi^*(SB)$                   |
| L+1  | -0.33  | 98                   | 0              | 0  | 2  | $\pi^*(SB)$                   |
| LUMO | -0.46  | 99                   | 0              | 0  | 1  | $\pi^*(SB)$                   |
|      |        | energy gap = 4.69 eV |                |    |    |                               |
| HOMO | -5.15  | 1                    | 97             | 0  | 2  | $\pi(N_3)$                    |
| H-1  | -5.35  | 5                    | 91             | 1  | 4  | $\pi(N_3)$                    |
| H-2  | -6.29  | 99                   | 0              | 0  | 0  | $\pi(SB)$                     |
| H-3  | -6.41  | 92                   | 0              | 7  | 0  | $\pi(SB)$                     |
| H-4  | -6.73  | 6                    | 1              | 91 | 2  | $\pi(Ac)$                     |
| H-5  | -6.96  | 97                   | 0              | 2  | 0  | $\pi(SB)$                     |

Ac = CH<sub>3</sub>COO, SB= reduced Schiff base

**Table S2. Selected Frontier molecular orbital energies (eV) and compositions (%) in the ground state for complex 2.**

| MO                   | energy | contribution |     |    |    | assignment (major)             |
|----------------------|--------|--------------|-----|----|----|--------------------------------|
|                      |        | SB           | NCS | Ac | Zn |                                |
| L+12                 | 2.4    | 79           | 16  | 1  | 3  | $\pi^*(SB)+\pi^*(NCS)$         |
| L+10                 | 2.16   | 59           | 18  | 2  | 21 | $\pi^*(SB)+\pi^*(NCS)+d^*(Zn)$ |
| L+5                  | 0.96   | 38           | 1   | 6  | 55 | $\pi^*(SB)+d^*(Zn)$            |
| L+4                  | 0.67   | 9            | 1   | 78 | 12 | $\pi^*(Ac)+d^*(Zn)$            |
| L+3                  | 0.01   | 100          | 0   | 0  | 0  | $\pi^*(SB)$                    |
| L+2                  | -0.18  | 99           | 0   | 0  | 1  | $\pi^*(SB)$                    |
| L+1                  | -0.39  | 98           | 0   | 0  | 2  | $\pi^*(SB)$                    |
| LUMO                 | -0.56  | 99           | 0   | 0  | 1  | $\pi^*(SB)$                    |
| energy gap = 4.69 eV |        |              |     |    |    |                                |
| HOMO                 | -5.25  | 1            | 99  | 0  | 1  | $\pi(NCS)$                     |
| H-1                  | -5.28  | 1            | 98  | 0  | 1  | $\pi(NCS)$                     |
| H-2                  | -6.35  | 100          | 0   | 0  | 0  | $\pi(SB)$                      |
| H-3                  | -6.51  | 94           | 0   | 6  | 0  | $\pi(SB)$                      |
| H-4                  | -6.88  | 8            | 1   | 90 | 2  | $\pi(Ac)$                      |
| H-5                  | -7.02  | 97           | 0   | 3  | 0  | $\pi(SB)$                      |

Ac = CH<sub>3</sub>COO, SB= reduced Schiff base

**Table S3. Frontier molecular orbital energies (eV) and compositions (%) in the lowest singlet excited state (S<sub>1</sub>) for complex 1.**

| MO                  | energy | contribution |                |    |    | assignment (major)            |
|---------------------|--------|--------------|----------------|----|----|-------------------------------|
|                     |        | SB           | N <sub>3</sub> | Ac | Zn |                               |
| L+5                 | 1.04   | 35           | 6              | 50 | 10 | $\pi^*(SB)+\pi^*(Ac)+d^*(Zn)$ |
| L+4                 | 0.78   | 11           | 1              | 10 | 78 | $\pi^*(SB)+\pi^*(Ac)+d^*(Zn)$ |
| L+3                 | 0.12   | 99           | 0              | 1  | 0  | $\pi^*(SB)$                   |
| L+2                 | 0.05   | 100          | 0              | 0  | 0  | $\pi^*(SB)$                   |
| L+1                 | -0.35  | 98           | 0              | 2  | 0  | $\pi^*(SB)$                   |
| LUMO                | -0.84  | 99           | 0              | 1  | 0  | $\pi^*(SB)$                   |
| energy gap = 4.3 eV |        |              |                |    |    |                               |
| HOMO                | -5.14  | 1            | 97             | 2  | 0  | $\pi(N_3)$                    |
| H-1                 | -5.34  | 5            | 91             | 4  | 1  | $\pi(N_3)$                    |
| H-2                 | -5.99  | 97           | 0              | 0  | 3  | $\pi(SB)$                     |

|     |       |    |   |   |    |                  |
|-----|-------|----|---|---|----|------------------|
| H-3 | -6.31 | 99 | 0 | 0 | 0  | $\pi(\text{SB})$ |
| H-4 | -6.76 | 5  | 1 | 2 | 93 | $d(\text{Ir})$   |
| H-5 | -6.98 | 98 | 0 | 0 | 2  | $\pi(\text{SB})$ |

Ac = CH<sub>3</sub>COO, SB= reduced Schiff base

**Table S4. Frontier molecular orbital energies (eV) and compositions (%) in the lowest singlet excited state ( $S_1$ ) for complex 2.**

| MO                   | energy | contribution |     |    |    | assignment (major)                |
|----------------------|--------|--------------|-----|----|----|-----------------------------------|
|                      |        | SB           | NCS | Ac | Zn |                                   |
| L+5                  | 1.01   | 37           | 2   | 5  | 55 | $\pi^*(\text{SB})+d^*(\text{Zn})$ |
| L+4                  | 0.62   | 7            | 1   | 82 | 10 | $\pi^*(\text{Ac})+d^*(\text{Zn})$ |
| L+3                  | 0.04   | 99           | 0   | 0  | 1  | $\pi^*(\text{SB})$                |
| L+2                  | 0.01   | 100          | 0   | 0  | 0  | $\pi^*(\text{SB})$                |
| L+1                  | -0.4   | 98           | 0   | 0  | 2  | $\pi^*(\text{SB})$                |
| LUMO                 | -0.92  | 99           | 0   | 0  | 1  | $\pi^*(\text{SB})$                |
| energy gap = 4.35 eV |        |              |     |    |    |                                   |
| HOMO                 | -5.27  | 1            | 99  | 0  | 1  | $\pi(\text{NCS})$                 |
| H-1                  | -5.29  | 1            | 98  | 0  | 1  | $\pi(\text{NCS})$                 |
| H-2                  | -6.06  | 97           | 0   | 2  | 0  | $\pi(\text{SB})$                  |
| H-3                  | -6.35  | 100          | 0   | 0  | 0  | $\pi(\text{SB})$                  |
| H-4                  | -6.93  | 8            | 1   | 89 | 2  | $\pi(\text{Ac})$                  |
| H-5                  | -7.03  | 96           | 0   | 4  | 0  | $\pi(\text{SB})$                  |

Ac = CH<sub>3</sub>COO, SB= reduced Schiff base

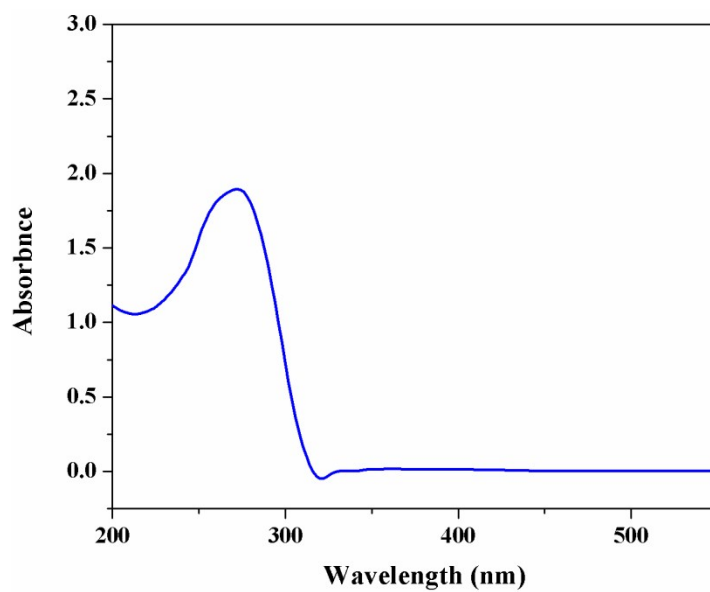

**Fig. S1.** UV-Vis spectrum of the ligand (H<sub>2</sub>L).

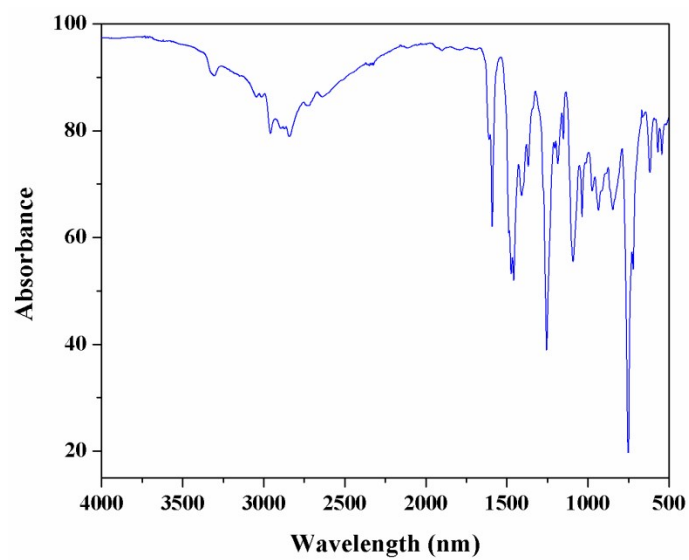

**Fig. S2.** IR spectrum of the ligand (H<sub>2</sub>L)

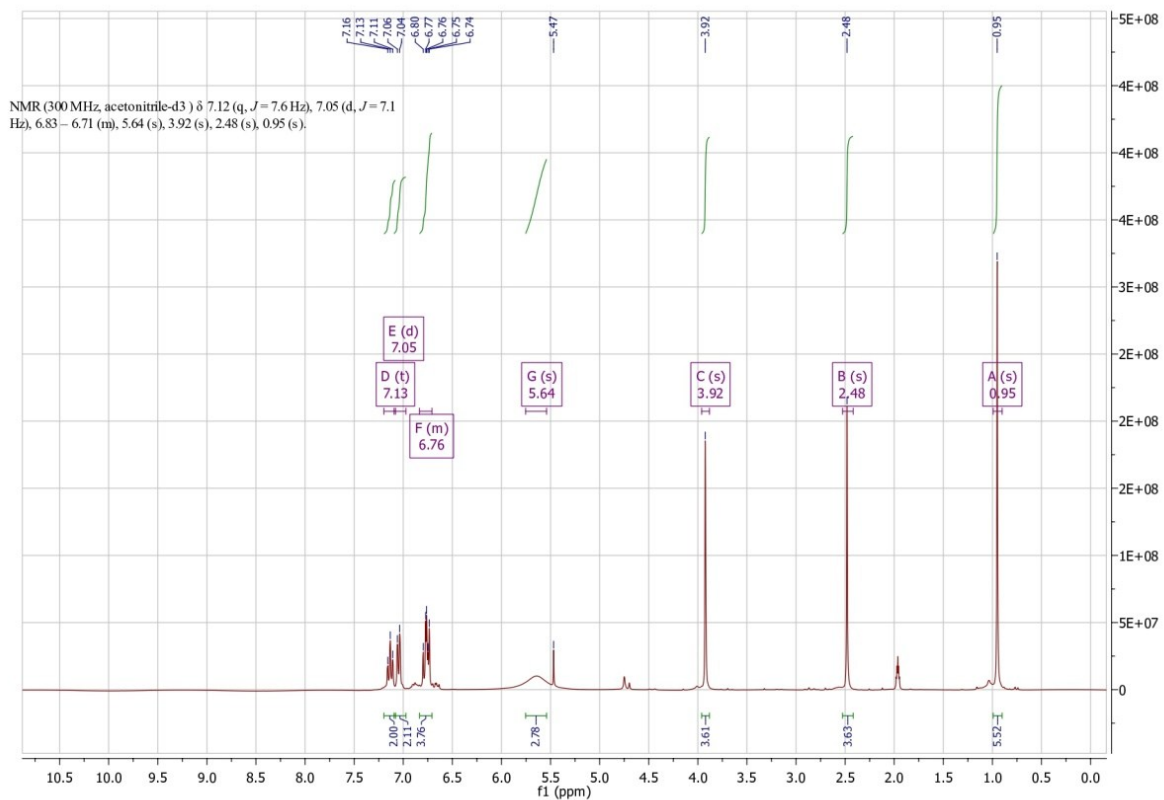

**Fig. S3.** NMR spectrum of the ligand (H<sub>2</sub>L)

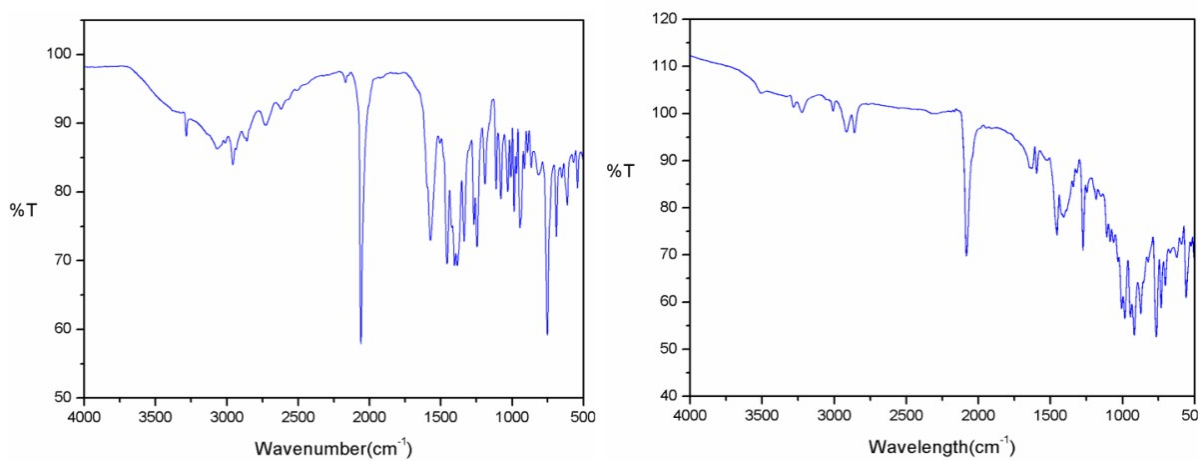

**Fig. S4.** IR spectra for complexes **1** (left) and **2** (right).

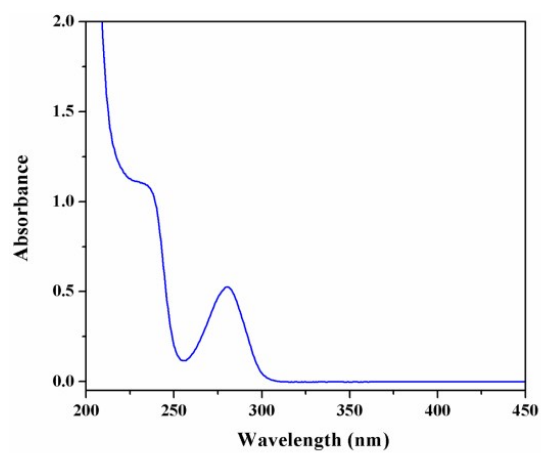

**Complex 1**

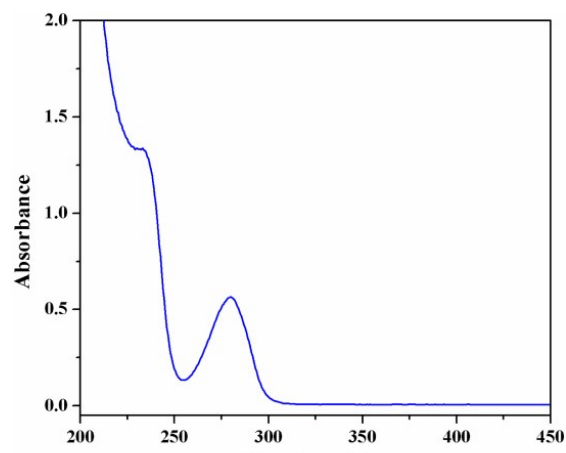

**Complex 2**

**Fig. S5.** UV-Vis absorption spectra of complexes **1** (left) and **2** (right).

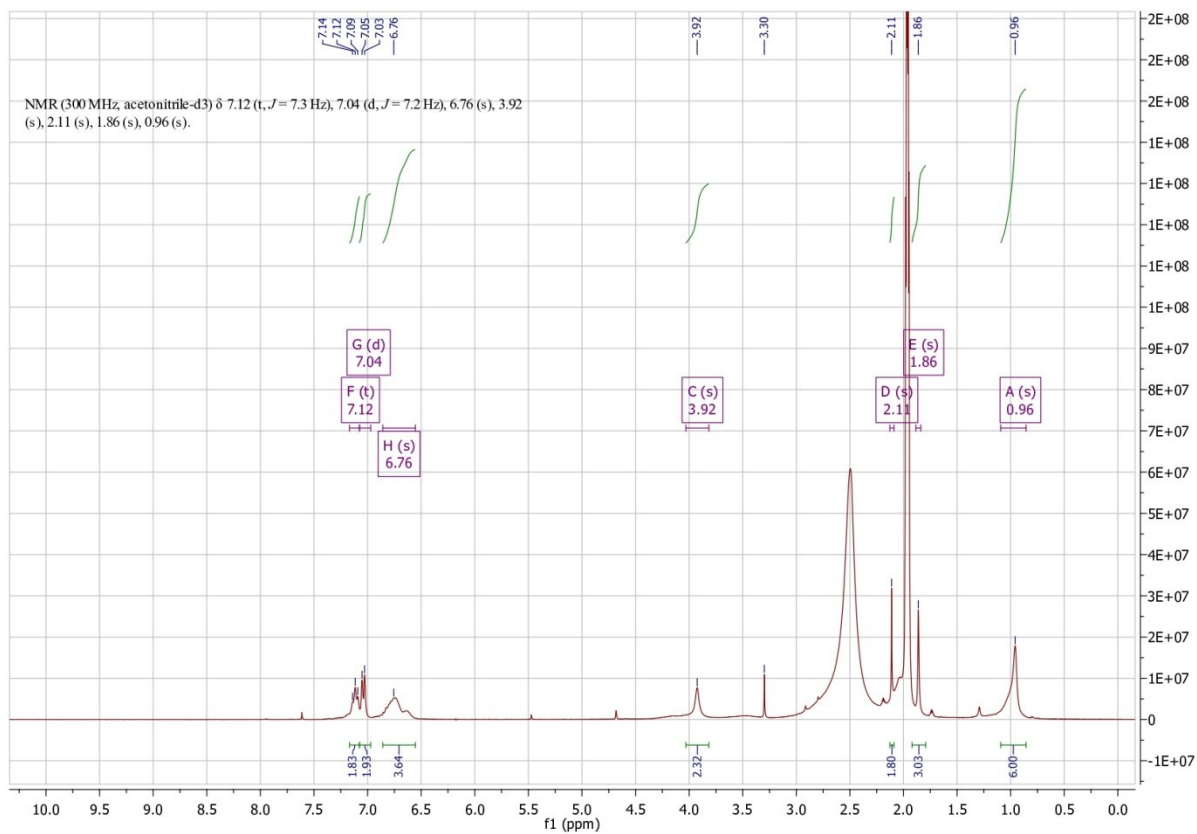

**Fig. S6.** NMR spectrum of complex 1.

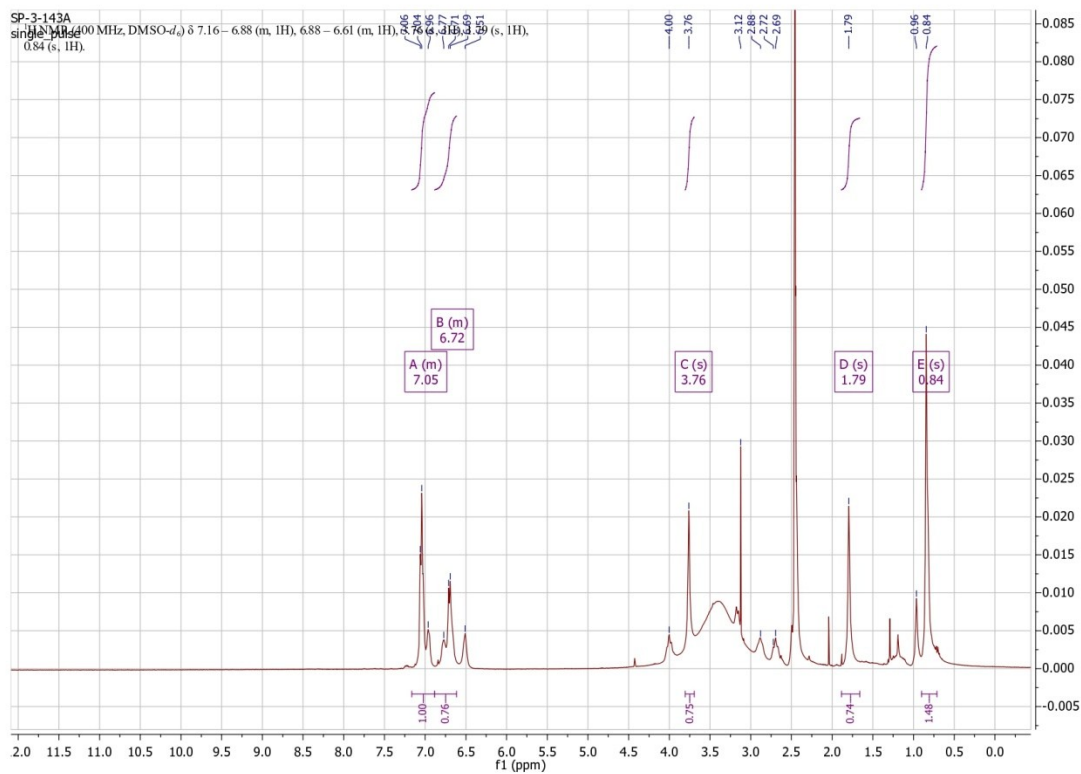

**Fig. S7.** NMR spectrum of complex 2.

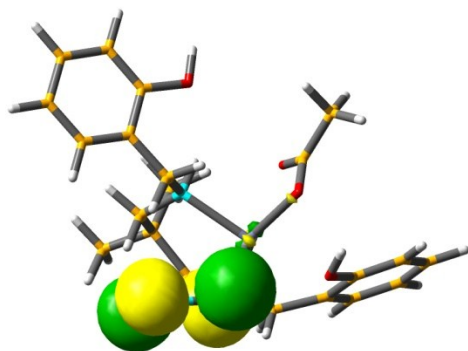

H

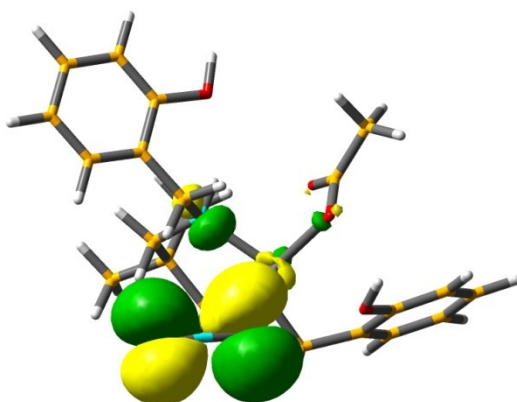

H-1

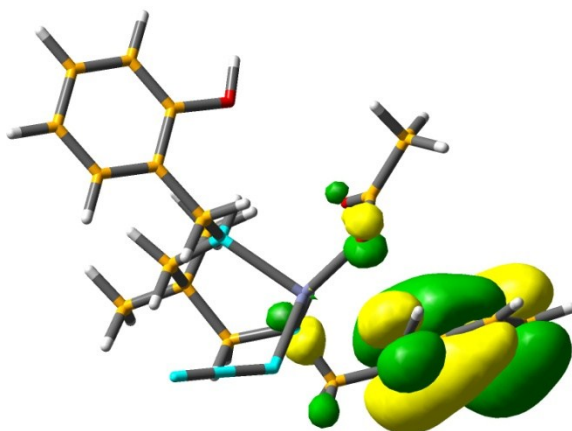

H-2



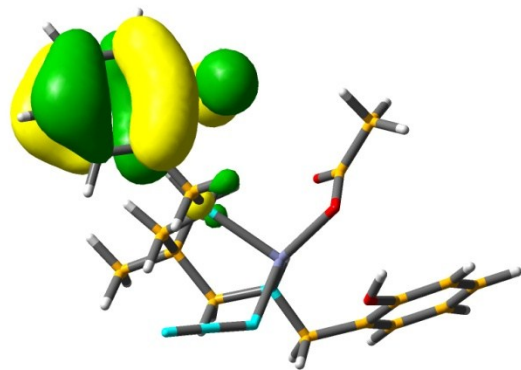

H-3

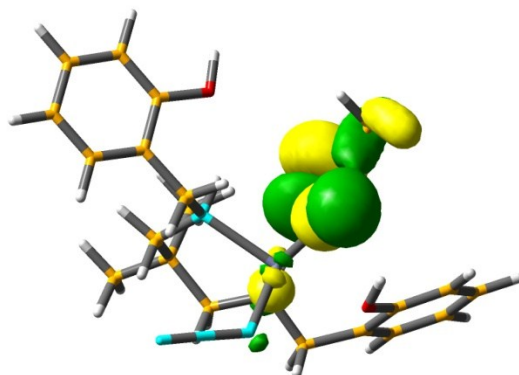

H-4

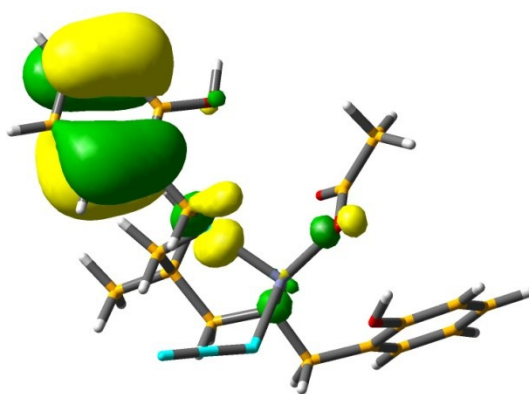

H-5

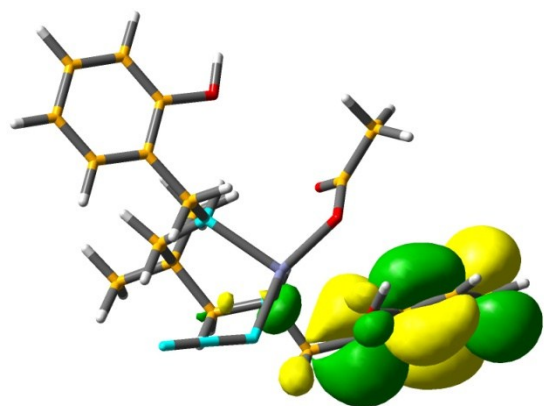

L

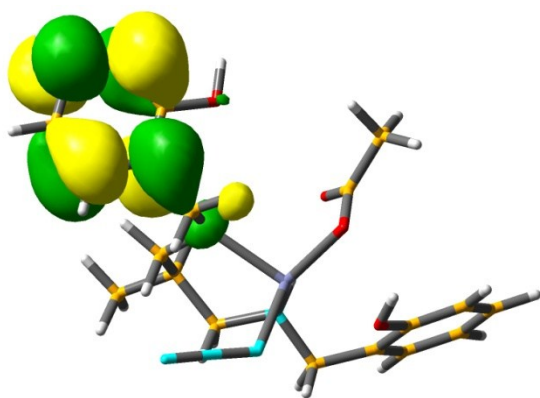

L+1

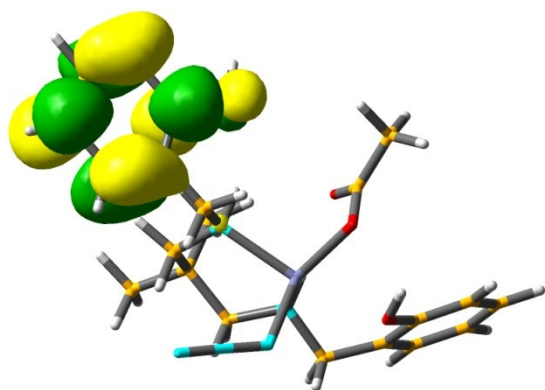

L+2

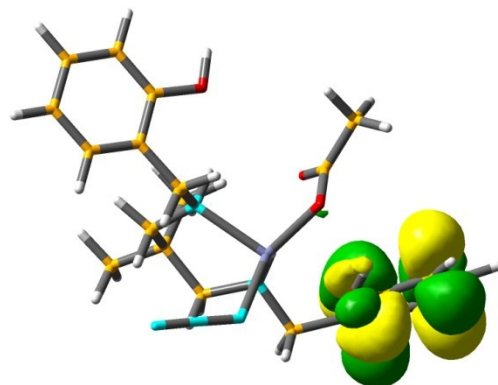

L+3

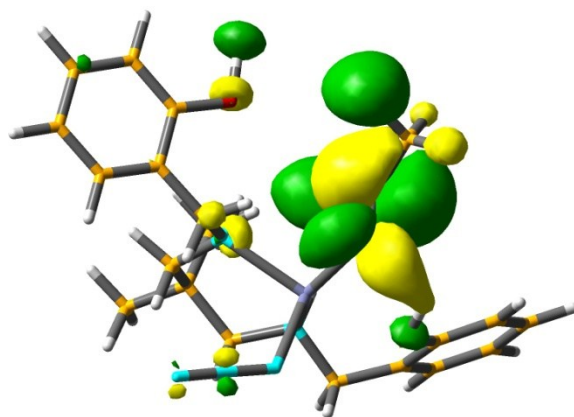

L+4

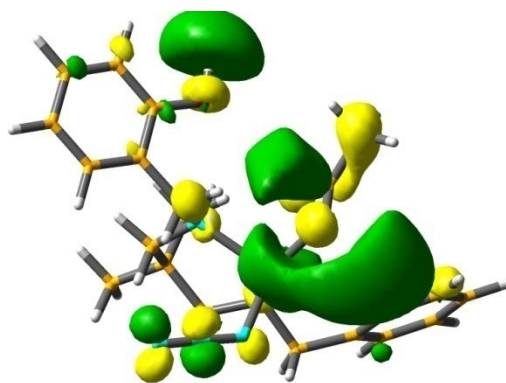

L+5

**Fig. S8.** Excited states of the complex **1**

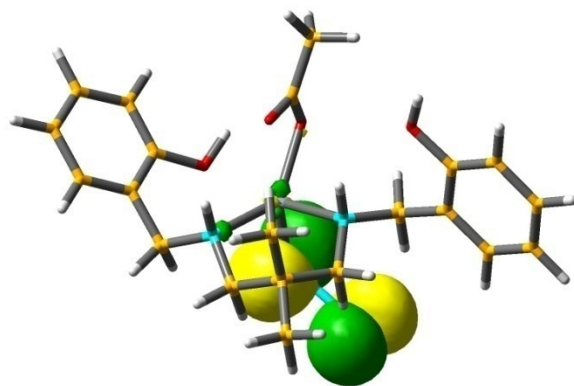

**H**

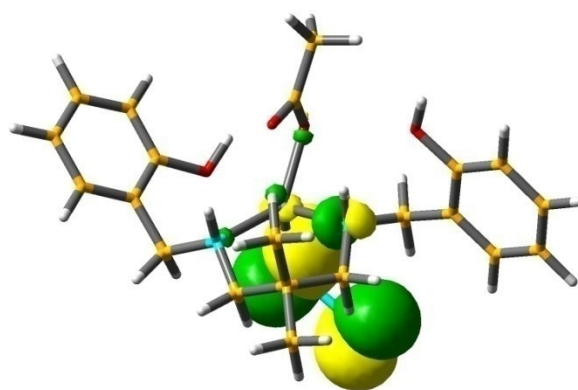

**H-1**

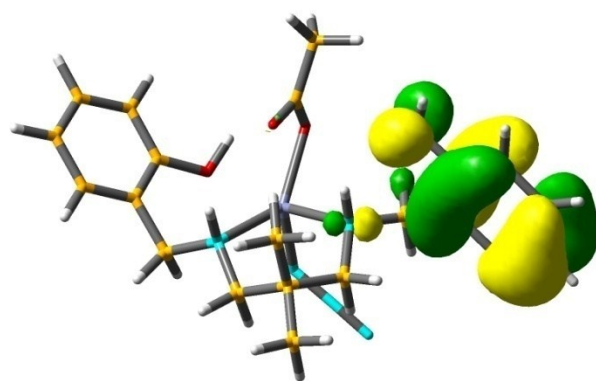

H-2

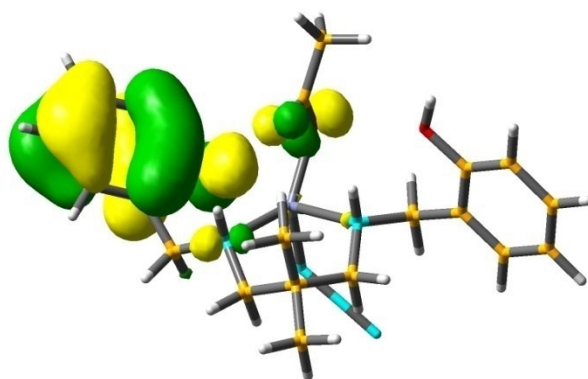

H-3

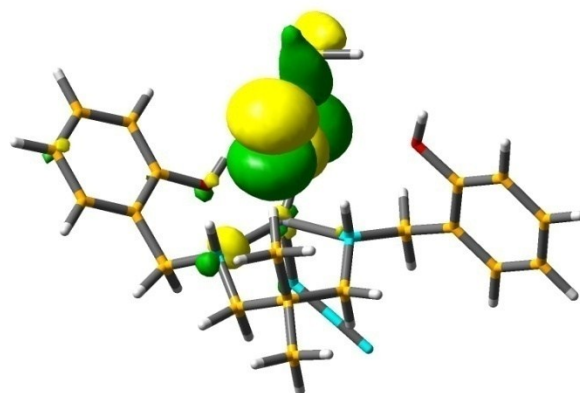

H-4

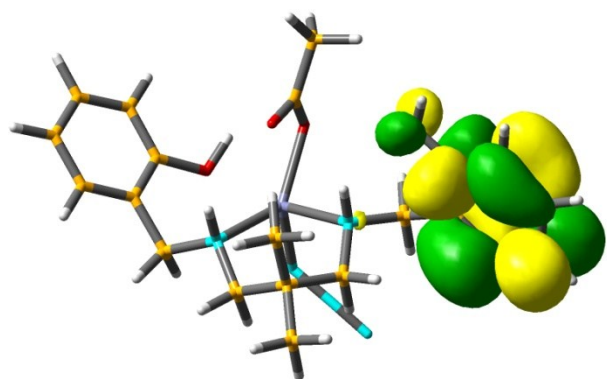

H-5

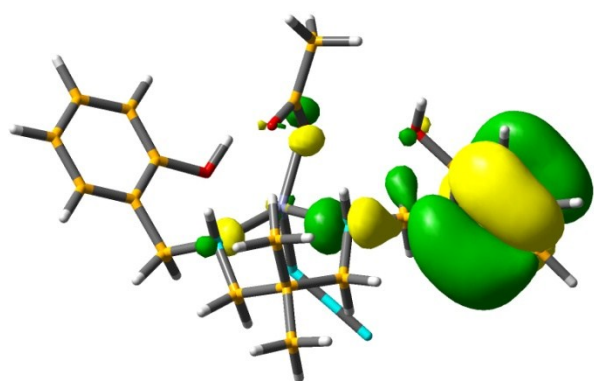

L

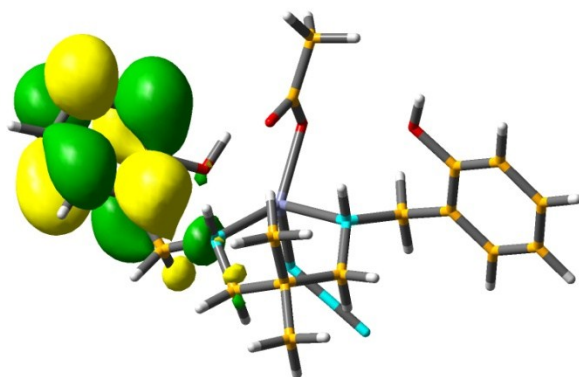

L+1

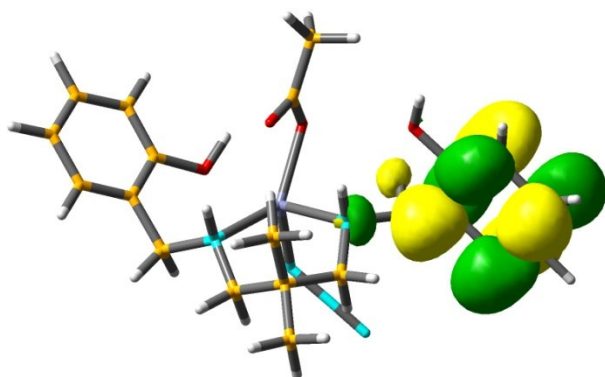

L+2

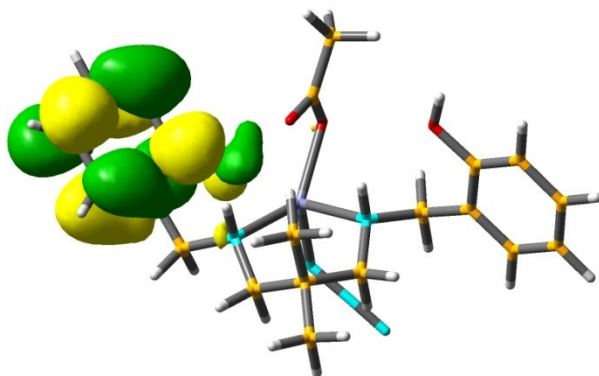

L+3

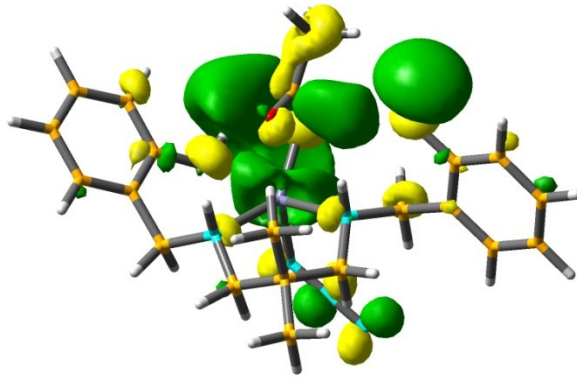

L+4

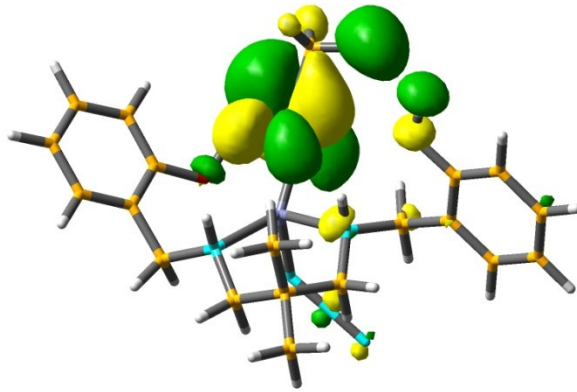

L+5



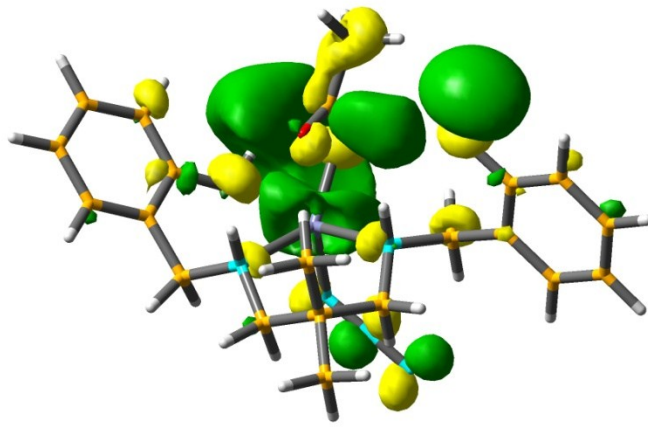

L+9

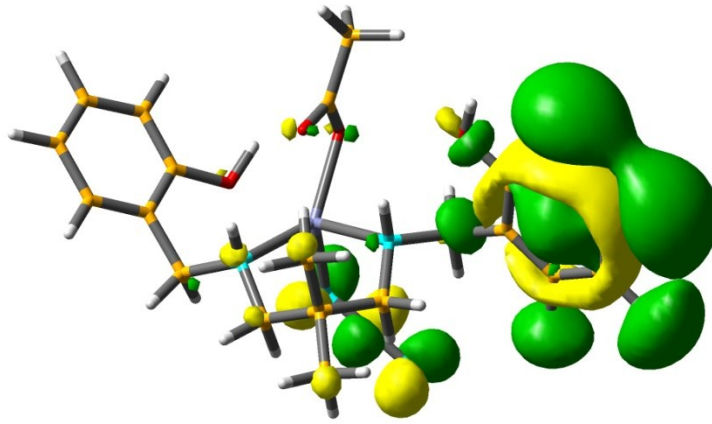

L+12

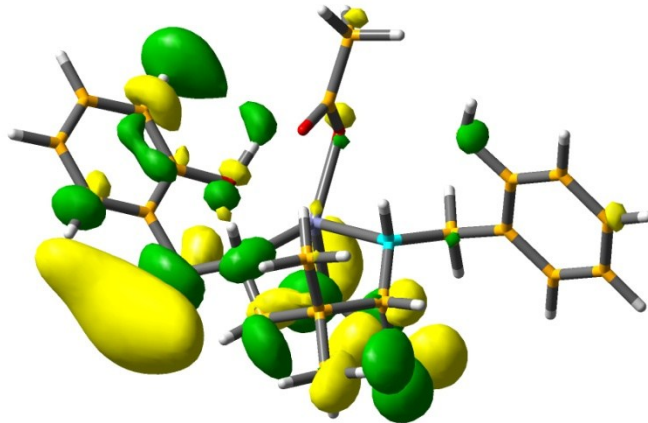

**L+13**

**Fig.S9.** Ground states of the complex **1**.

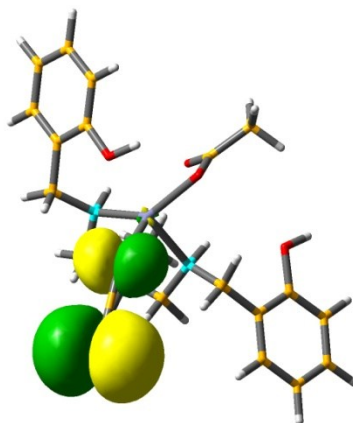

**H**

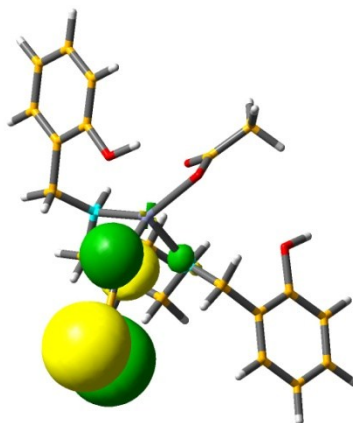

**H-1**

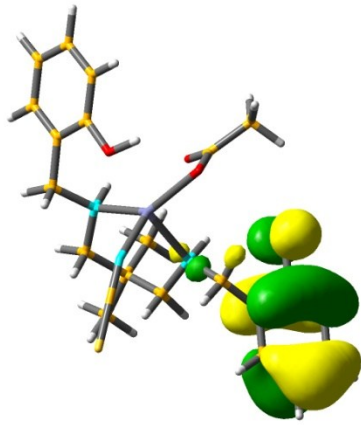

H-2

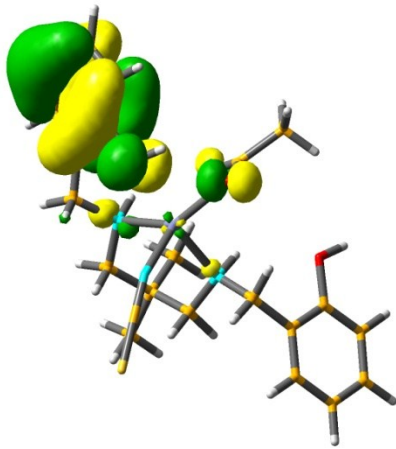

H-3

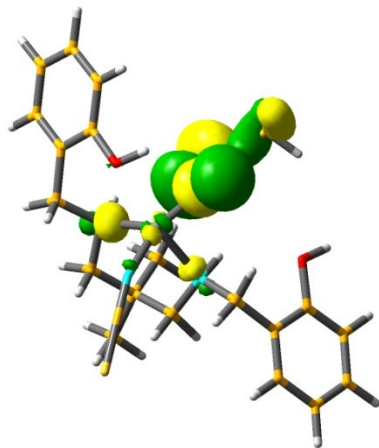

H-4

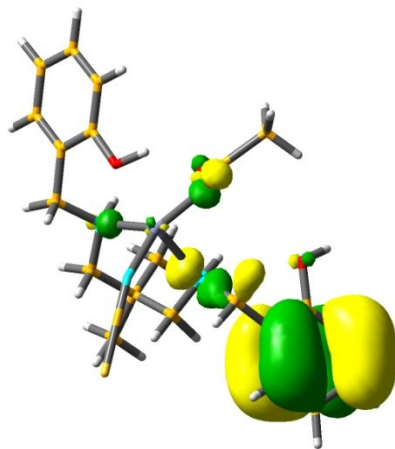

H-5

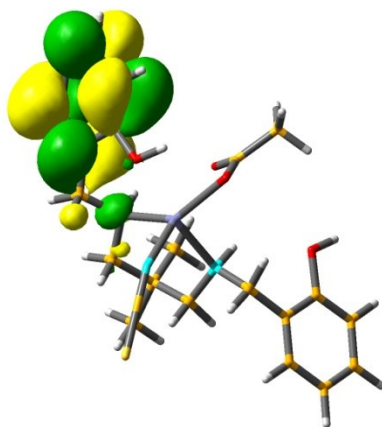

L

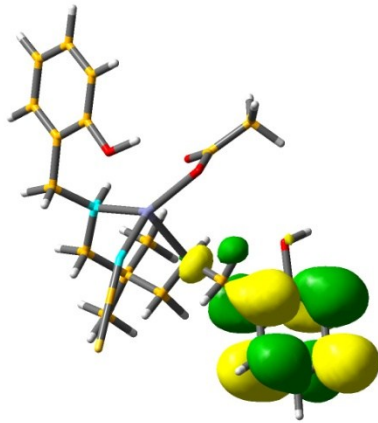

**L+1**

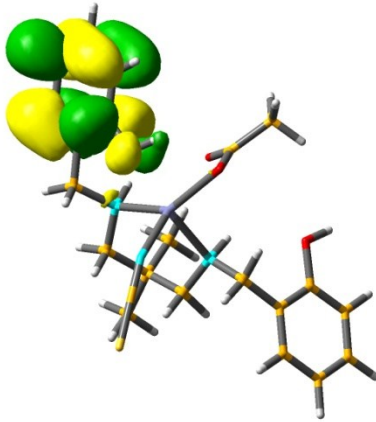

**L+2**

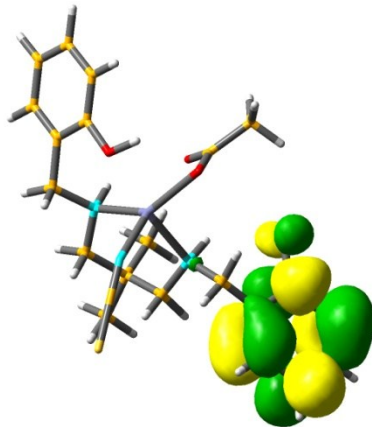

**L+3**

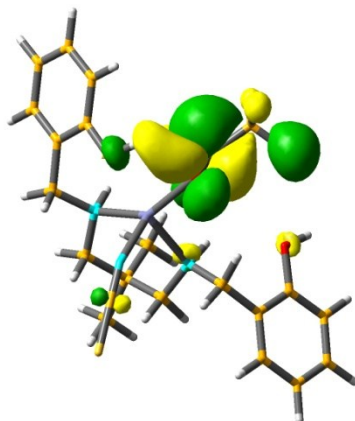

**L+4**

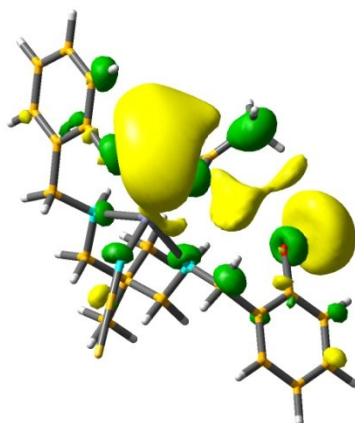

**L+5**

**Fig. S10.** Excited states of the complex **2**

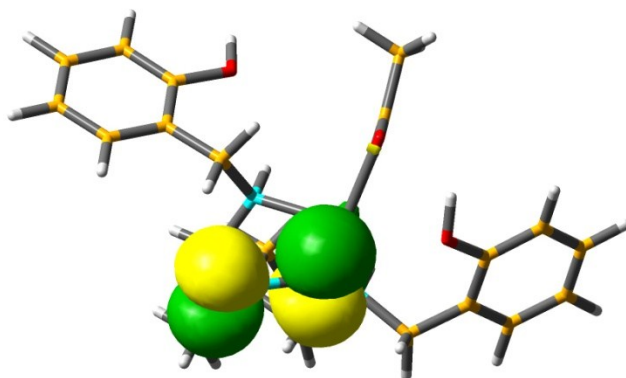

H

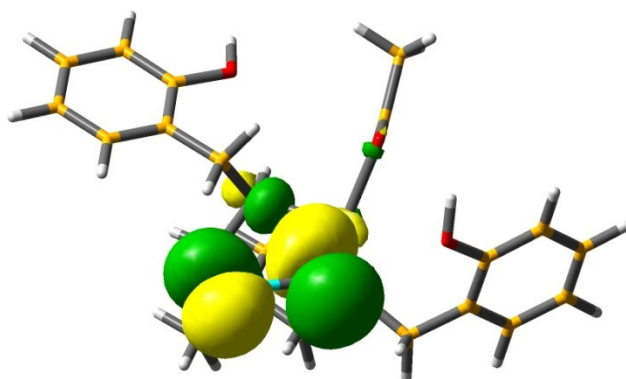

H-1

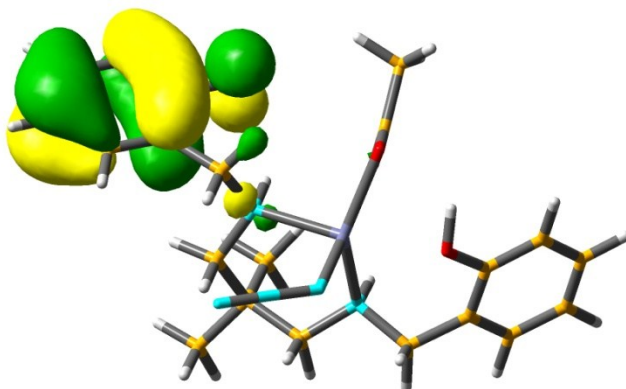

H-2

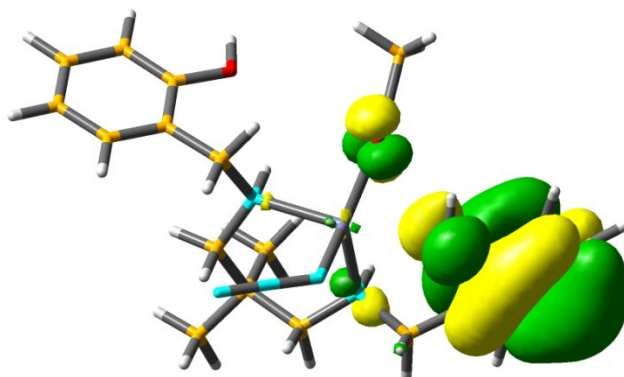

H-3

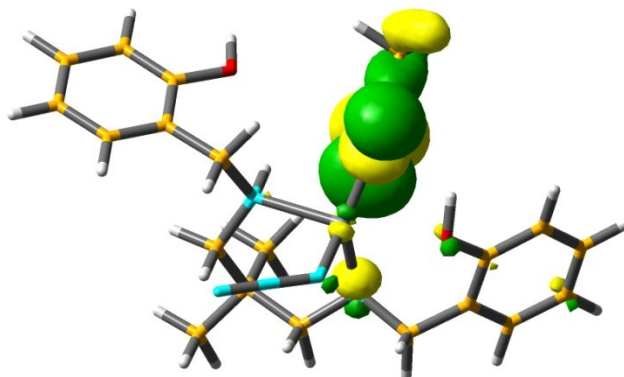

H-4



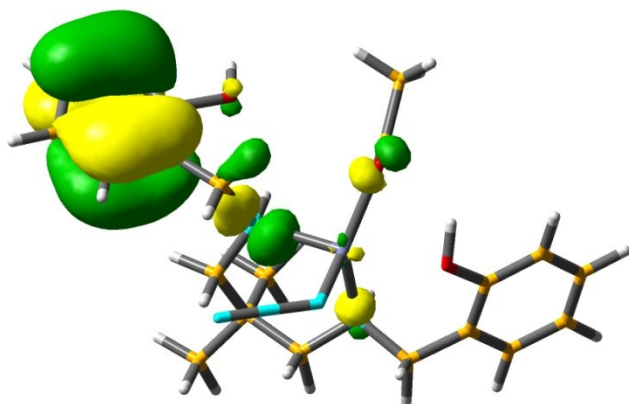

H-5

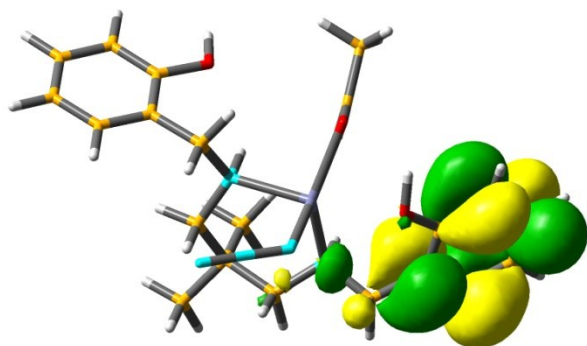

L

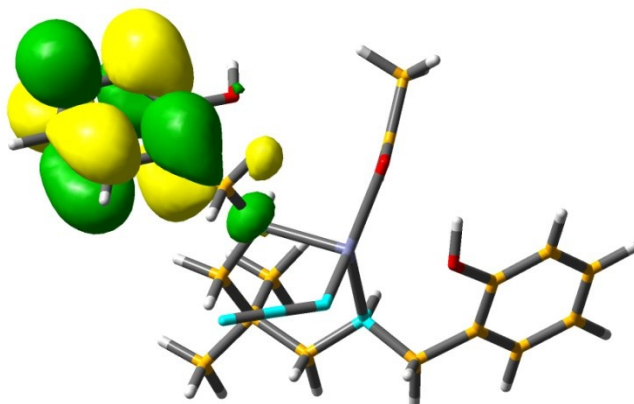

L+1

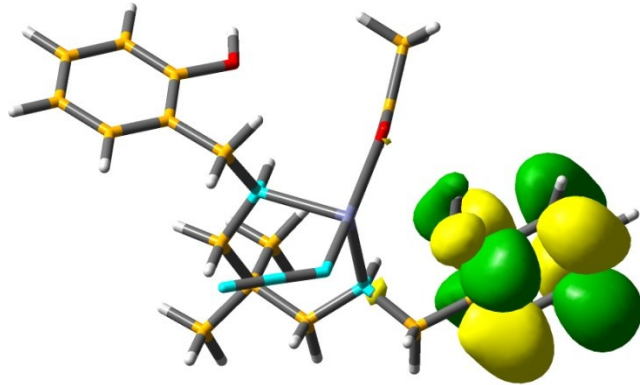

L+2

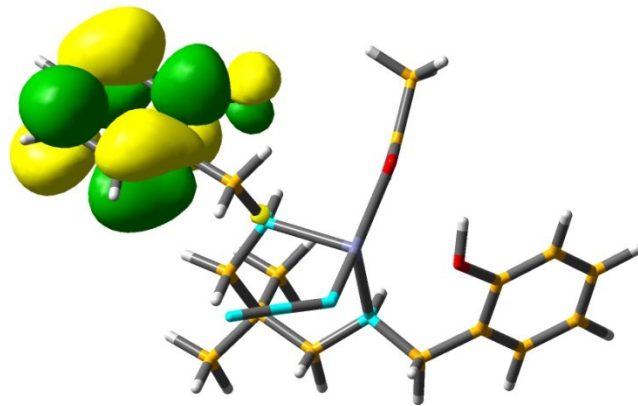

L+3

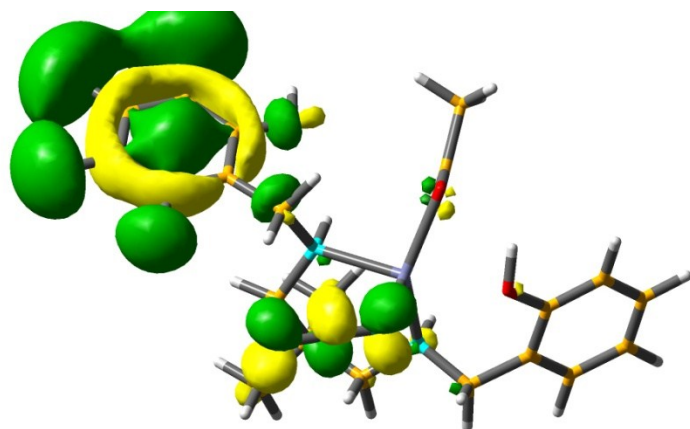

L+4

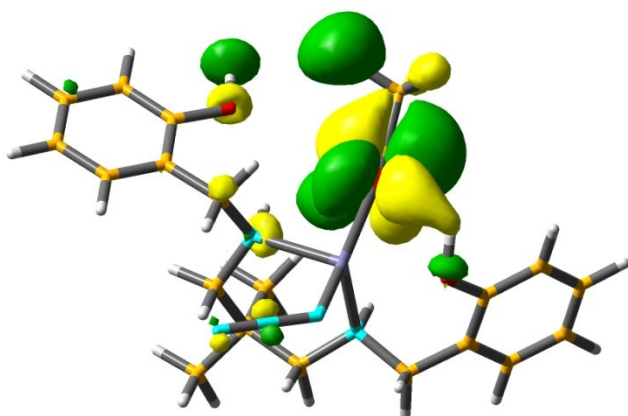

L+5

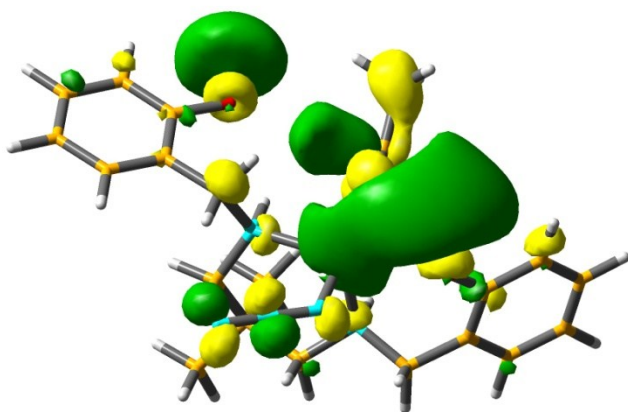

**L+10**

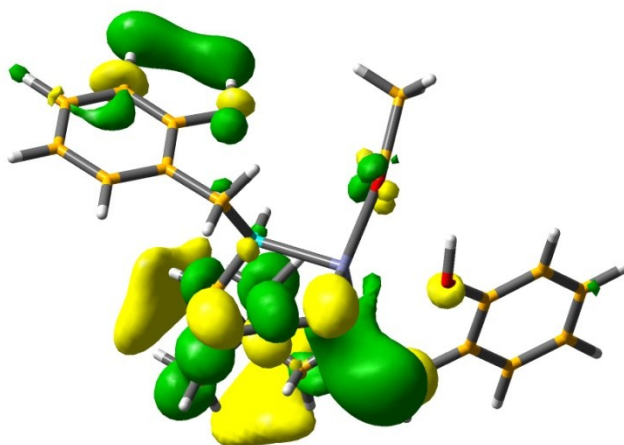

**L+12**

**Fig. S11.** Ground states of the complex **2**
